# Supplementary material
Source: publisher figshare collection journal article supplement (https://acs.figshare.com/ndownloader/files/12715433)
Supplement: Supplementary file 1 [file 12715433]

## **Supporting Information**

Dual Activity of Rose Bengal Functionalized to Albumin-Coated Lanthanide-Doped  
Upconverting Nanoparticles: Targeting and Photodynamic Therapy

*Tarek Sabri, Peter D. Pawelek, John.A. Capobianco\**

*Department of Chemistry and Biochemistry and Centre for NanoScience Research Concordia  
University. 7141 Sherbrooke St. West, Montreal, Quebec H4B 1R6, Canada*

*E-mail: John.Capobianco@concordia.ca*

## Experimental Section

### 1- Synthesis of NaGdF<sub>4</sub>: Yb<sup>3+</sup>/Er<sup>3+</sup> (Ln-UCNPs)

Monodisperse upconverting NaGdF<sub>4</sub>:Yb<sup>3+</sup>/Er<sup>3+</sup> nanoparticles were synthesised by thermal decomposition technique established by our group <sup>1</sup>. Erbium oxide (Er<sub>2</sub>O<sub>3</sub>, 99.99%), Gadolinium oxide (Gd<sub>2</sub>O<sub>3</sub>), Ytterbium oxide (Yb<sub>2</sub>O<sub>3</sub>), trifluoroacetic acid (CF<sub>3</sub>COOH, 99%), Sodium trifluoroacetate (NaCF<sub>3</sub>COONa, 98%), oleic acid (technical grade, 90 %), and 1-octadecene (technical grade, 90%) were all purchased from Sigma-Aldrich and were used without any further purification. First, lanthanides precursors are prepared by dissolving Gd<sub>2</sub>O<sub>3</sub> (0.534 g, 9.75x10<sup>-4</sup> mole, 78 mol %), Er<sub>2</sub>O<sub>3</sub> (0.0096 g, 2.5x10<sup>-5</sup> mole, 2 mol %), and Yb<sub>2</sub>O<sub>3</sub> (0.0985 g, 2.5x10<sup>-4</sup> mole, 20 mol %) in a 10 ml mixture of distilled water and trifluoroacetic acid (1:1) at 80 °C for 12 hours under reflux. The solvent was evaporated slowly at 60 °C for 16 hours to produce a white powder. Sodium trifluoroacetate (0.34 g, 2.5 x10<sup>-3</sup> mole) was added over the dried precursor and the solution is gradually heated up to 125 °C under vacuum in the presence of 7.5 mL oleic acid and 7.5 mL 1-octadecene. Meanwhile, a receiving flask containing 12.5 mL oleic acid and 12.5 mL 1-octadecene heated up to 150 °C under vacuum for 30 minutes, followed by a direct temperature increase up to 310 °C under inert atmosphere using gentle flow of argon gas. Heated precursors were injected to the receiving flask at rate of 1.5 mL/min using syringe and pump system and left stirring for an additional hour. The solution was cooled down to room temperature, and NaGdF<sub>4</sub>: Yb<sup>3+</sup>/Er<sup>3+</sup> nanoparticles were precipitated with ethanol. Nanoparticles were isolated by centrifugation 3400 rpm for 15 minutes. For additional purification, collected pellet were washed twice with hexanes/ ethanol (1:4).

## **2- Transmission electron microscopy and negative staining**

To determine the particle size and morphology, high resolution transmission electron microscopy using a Philips CM200 operated at 200kV equipped with a charge coupled device (CCD) camera (Gatan) was used. A solution of 0.1 wt % Ln-UCNPs was prepared in toluene and 15  $\mu$ L of the solution was evaporated on a formavar/carbon film supported on a 200 mesh copper grid. Samples for the negative stain were prepared by adding 5  $\mu$ L of BSA coated Ln-UCNPs in water (0.5 mg/mL) to copper grid, and sample left to air dry. Later, 5  $\mu$ L of 1.5% uranyl formate solution in 5 M NaOH solution was added, incubated for 1 min and allowed to dry.

## **3- X-Ray powder diffraction**

X-ray powder diffraction (XRPD) measurements was performed using Scintag XDS-2000 diffractometer equipped with Si(Li) solid state Peltier detector, a Cu K $\alpha$  source using a generator power of 40mA and 45 kV, receiving beam slits (0.2-0.5 mm), and beam divergent (2 mm and 4 mm). The range of the scan was set between 20-80° 2 $\theta$  with a 0.02° step size and a count time of 1 s.

## **4- Bovine serum albumin (BSA) coated NaGdF<sub>4</sub>: Yb<sup>3+</sup>/Er<sup>3+</sup>**

A modified version of BSA nanoparticle synthesis protocol <sup>2</sup>, was used to produce water-monodisperse BSA coated NaGdF<sub>4</sub>: Yb<sup>3+</sup>/Er<sup>3+</sup> (BSA-Ln-UCNPs). To prepare the coated nanoparticles, 2 mg of Ln-UCNPs were dispersed in 7 mL ethanol, sonicated for 10 minutes and injected using a syringe and pump system to a BSA (Bovine Serum Fraction V, Bioshop) solution 1mg/mL at a rate of 1 mL/min. Once the injection was terminated, different volumes (4, 15, 20, 30  $\mu$ L) of (8%) glutaraldehyde solution was added, and the reaction stirred for an additional 4

hours. BSA-Ln-UCNPs were centrifuged (12470 g, for 5 minutes) and the white pellet washed 3 times with ultrapure water and stored in water at -20 °C.

### **5- Thermogravimetric Assay (TGA)**

TGA was used to estimate the actual mass of BSA on the surface on of the Ln-UCNPs. The mass of oleate was quantified by measuring the mass loss of NaGdF<sub>4</sub>: Yb<sup>3+</sup>/Er<sup>3+</sup> between 250-600 °C. Initial mass of the Ln-UCNPs used was 9.845 mg and showed a total weight loss of 2.65%. This represents  $5.63 \times 10^{16}$  molecules of oleate per 1 mg Ln-UCNPs, which corresponds to a surface coverage of approximately 15 % , based on the surface area of 0.4 nm<sup>2</sup> for the oleate molecule <sup>3</sup>, and 15290 nm<sup>2</sup> area of single Ln-UCNPs. The area of the Ln-UCNPs is calculated by measuring the average length of the hexagon prism shown by TEM. Similarly, TGA measurement was carried out for BSA-Ln-UCNPs and percent mass loss was recorded between 200 °C and 800 °C, showing a 15.24 % mass loss which represents 120.64 µg for 1 mg Ln-UCNPs. BSA has a molecular weight of 66 463 kDa, this will imply to 112 BSA molecules per single Ln-UCNP.

### **6- Primary amine quantification**

Trinitrobenzenesulfonic acid (TNBS) a well-established method for primary amines quantification, and protein detection, was used to quantify free amine on BSA-Ln-UCNPs <sup>4</sup>. Briefly, 0.25 mL of TNBS solution in 0.01% NaHCO<sub>3</sub> was mixed with lysine standard solutions between 1-10 µg, for a total volume of 2 mL per sample to generate a standard curve. Mixtures were incubated for 2 hours at 37 °C, followed by addition of 0.25 mL 10% SDS, and 0.125 mL of 1M HCl generating an orange color that was quantified by measuring the absorbance at 346 nm. BSA-Ln-UCNPs quantification was obtained using the lysine standards. Based on calibration curve we estimated that 2128 primary amine sites per single BSA-Ln-UCNPs.

## **7- Luminescent intensity NaGdF<sub>4</sub>: Yb<sup>3+</sup>/Er<sup>3+</sup>**

To study the influence of water on the luminescence of the Er<sup>3+</sup> ions of the BSA conjugated nanoparticles the emission spectra were recorded using ultra pure water and D<sub>2</sub>O as the solvent. A 980 nm diode laser (F6 series fiber coupled, 0.5 W power) was used to excite the sample solution (1 wt %). The emission spectra were collected using a double monochromator (Jarrell-Ash Czerny Turner), photomultiplier tube (R943-02, Hamamatsu), SR440 (Standard research amplifier), SR400 (Gated photon counter), and SR465 (computer data acquisition software).

## **8- Rose Bengal linker addition, and surface conjugation**

RB (Rose Bengal) was modified by adding a hexanoic acid linker to facilitate coupling with the primary amines of BSA that is coated on the nanoparticles surface <sup>5</sup>. In brief 50 mM RB and 125 mM 6-bromohexanoic acid were mixed in 70% acetone solution (20 mL) and refluxed at 60 °C for 18 hours. The reaction mixture was acidified with H<sub>2</sub>SO<sub>4</sub> and extracted three times using dichloromethane (30 mL). The sample was dried under vacuum for 24 hours. Matrix assisted laser desorption ionization mass spectrometry (MALDI-MS) was used to confirm the modification to RB. In order to couple modified RB to BSA-Ln-UCNPs, 20 mM modified RB was mixed with 50 mM EDC (1-Ethyl-3-(3-dimethylaminopropyl)carbodiimide, Sigma-Aldrich) and 50 mM NHS (N-Hydroxysuccinimide, Sigma-Aldrich) in DMSO and stirred for three hours at room temperature. Different concentration of nanoparticles were added over the mixture and stirred overnight (in dark). Dialysis was performed using ultrapure water for 4 hours, and 16 hours using 12-14 kD membrane (Spectrum labs). RB-BSA-Ln-UNCPs are collected via centrifugation (14000 rpm), and washed three times using ultra pure water and the sample was stored at -20 °C.

## **9-Energy transfer measurements**

The concentration of modified RB coupled to BSA-Ln-UCNPs was determined using RB calibration curve. Three different concentrations (30, 20, and 3  $\mu$ M) were conjugated to BSA-Ln-UCNPs. For Luminescent intensity measurements, same concentration of Ln-UCNPs were optimized to 1 mg/ ml in water using ICP-MS (inductively coupled plasma mass spectrometry, Agilent 7500ce). BSA-Ln-UCNPs were used as standard emission under 980 nm excitation. Energy transfer is attributed to the decrease in the intensity of  $^4S_{3/2}$ - $^4I_{15/2}$  transition at 540 nm for RB-BSA-Ln-UCNPs emission compared to BSA-Ln-UCNPs.

## **10-Singlet oxygen measurement**

DPBF (1,3 diphenylisobenzofuran, Sigma-Aldrich) probe was used to detect singlet oxygen production <sup>6</sup>. RB-BSA-Ln-UCNPs (1mg/ml) are dispersed in 1:1 ratio in deuterated solvents of Dimethyl sulfoxide- $d_6$  (Sigma Aldrich), and  $D_2O$  (Sigma Aldrich). Absorbance of DPBF (35  $\mu$ M) at 415 nm was measured prior to 980 nm laser irradiation. 980 nm excitation of RB-BSA-Ln-UCNPs was performed at 15 minute time intervals for a total time of 90 minutes. Assuming 1:1 ratio of singlet oxygen and DPBF, approximately 28 % of DPBF was consumed which was used to calculate the production of molecules of singlet oxygen ( $5.9 \times 10^{21}$ ).

## **11- In vitro localization assay**

Cellular localization of the nanoconstruct was tested using A549 lung cancer cell lines. 35 mm cell culture dish cells are seeded with a density of  $2.5 \times 10^3$  cells. After 24 hours, different concentration of RB-BSA-Ln-UCNPs were mixed with 2 mL cell culture medium that contained F-12k (Wisent Bioproducts) with 10% FBS (Thermofisher Scientific), and 1% Penicillin/ streptomycin

(ThermoFisher Scientific) (10, 000 U)/mL. RB-BSA-Ln-UCNPs were incubated for 4 hours, followed by isotonic saline washing using PBS (ThermoFisher Scientific). Furthermore, cells are fixed with 10 % formalin (Sigma Aldrich) for 15 minutes, followed by washing with PBS twice. Fixed cells are stored at 4 °C, and imaged using a Zeiss LSM780 confocal microscope.

## **12- Cell viability assay**

A549 lung cancer cells were seeded on 96-well plate with a density of 5000 cells/ well. The cells allowed to grow for 18 hours, followed by PBS wash and the addition of 100 µL cell culture medium (F-12k medium with 10% FBS and 1% Penicillin/streptomycin (10, 000 U)/mL). Different concentrations of RB-BSA-Ln-UCNPs were incubated with A549 cells for 4 hours at 37 °C. The cells are washed with PBS and incubated for additional hour at 37 °C in cell culture medium. After this, cells are irradiated with 980 nm for a period of 10 minutes. A549 cells are allowed to grow for additional 18 hours. Later MTT ((3-[4,5-dimethylthiazol-2-yl]-2,5-diphenyltetrazoliumbromide, Thermo-Fisher Scientific) reagent (0.2 mg/mL in cell culture medium) was added to cells and incubated for 4 hours at 37 °C. Formazan crystals formed are dissolved by the addition of 150 µL of DMSO, and MTT absorbance at 590 nm measured using 96-well plate (BioTeK). Same procedure as above was done for RB-BSA-Ln-UCNPs but without irradiation to estimate the toxicity of nanoconstruct by itself for A549 cells.

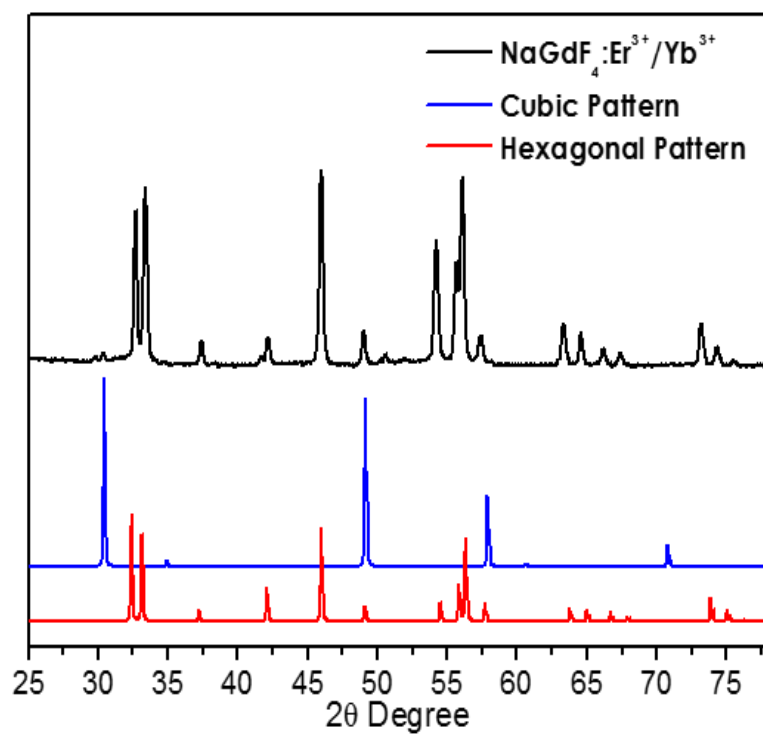

**Figure S1.** X-ray powder diffraction pattern of  $\text{NaGdF}_4:\text{Yb}^{3+}/\text{Er}^{3+}$  (Black). Spectrum comparisons are drawn to reference hexagonal and cubic phases shown in red and blue respectively.



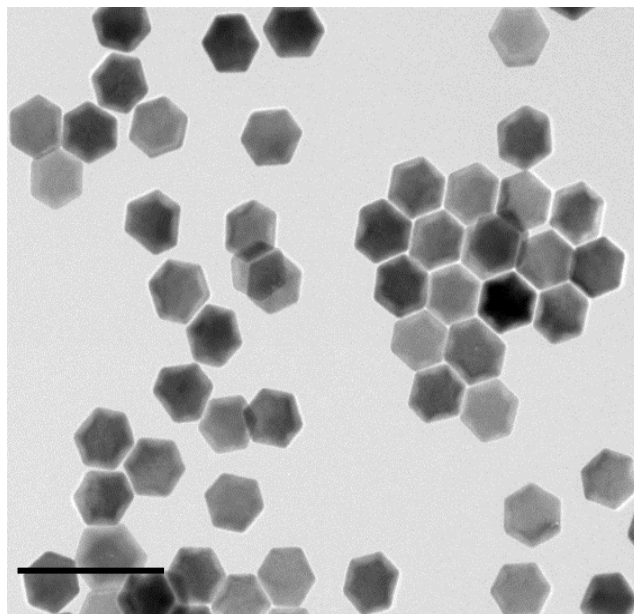

**Figure S2.** TEM image of NaGdF<sub>4</sub>: Yb<sup>3+</sup>/Er<sup>3+</sup>, 1% solution in Toluene. Average size of the particle is 78 nm  $\pm$  2.9 nm (scale 500 nm)

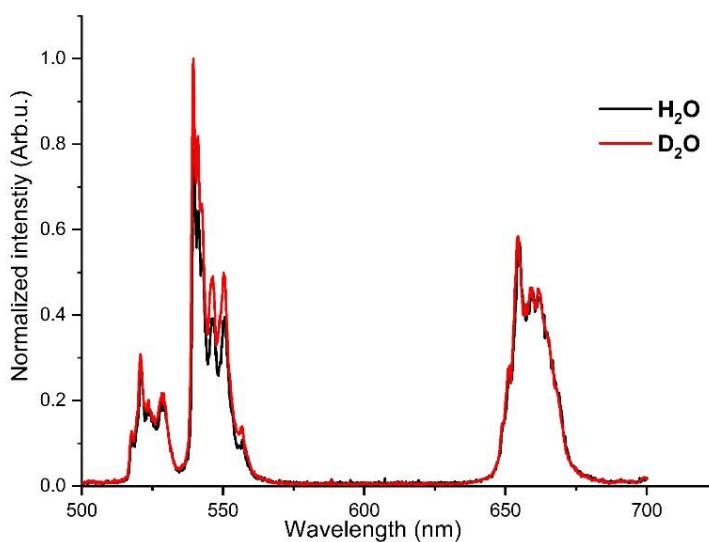

**Figure S3.** Luminescent intensity measurements using 980 nm excitation. Same concentration of BSA coated NaGdF<sub>4</sub>: Yb<sup>3+</sup>/Er<sup>3+</sup> used for both measurements (1mg/ml). In red sample in D<sub>2</sub>O, and black in H<sub>2</sub>O.

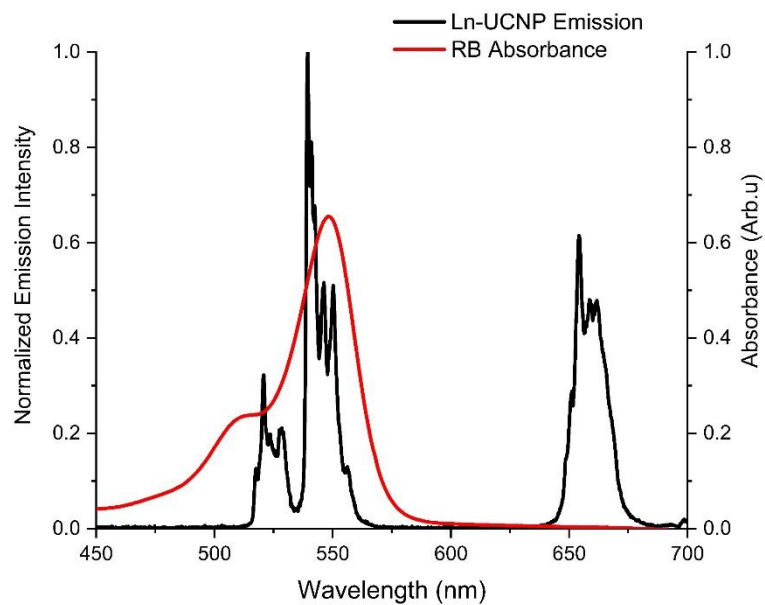

**Figure S4.** Overlap spectrum of NaGdF<sub>4</sub>: Yb<sup>3+</sup>/Er<sup>3+</sup> and RB. Luminescence emission using 980 nm excitation shown in black, and RB absorbance shown in red.

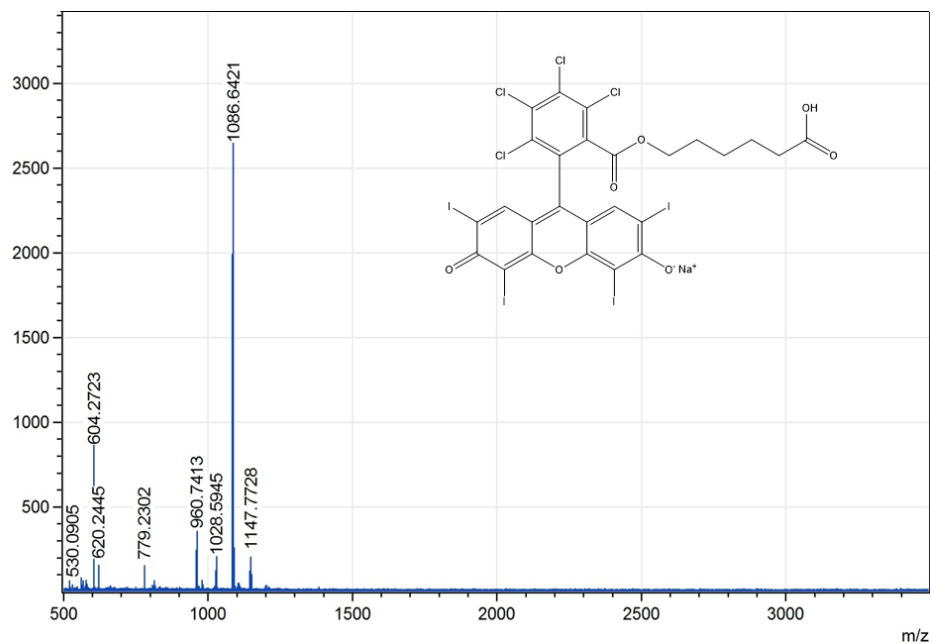

**Figure S5 :** MALDI-MS for hexanoic acid modified RB. (M-H) ionization peak at 1086.6421 represents the expected molecular weight for the modified RB.

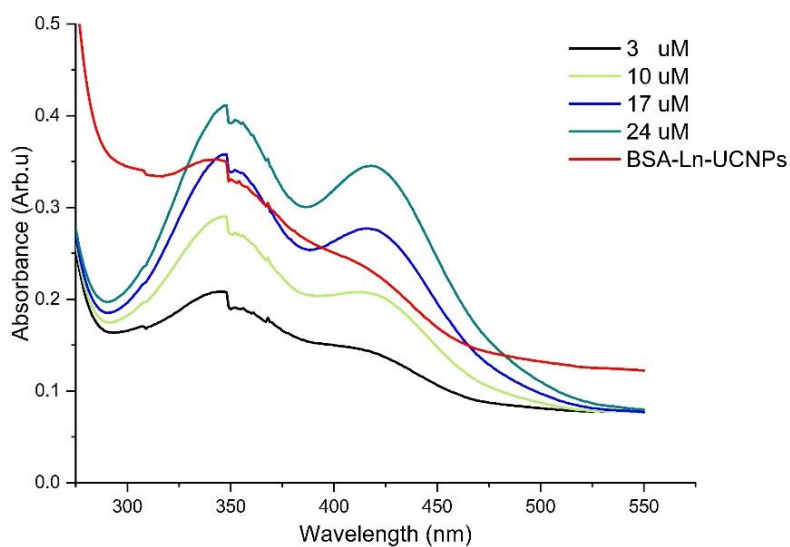

**Figure S6.** TNBS assay for primary amine quantification. Lysine used as standard with different concentrations. BSA-Ln-UCNPs (1 mg/ml, H<sub>2</sub>O) unknown primary amine concentration shown in red.

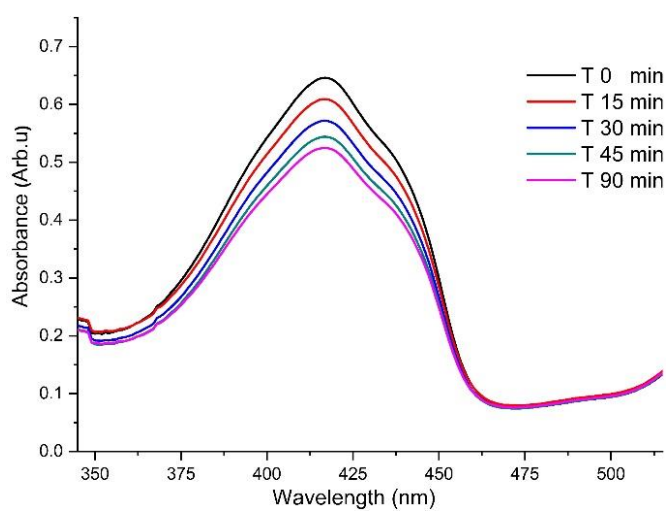

**Figure S7.** DPBF absorption decrease as a function of irradiation time using 980 nm. 1mg/ml nanoparticles in deuterated DMSO and D<sub>2</sub>O (1:1) with 35  $\mu$ M DPBF.

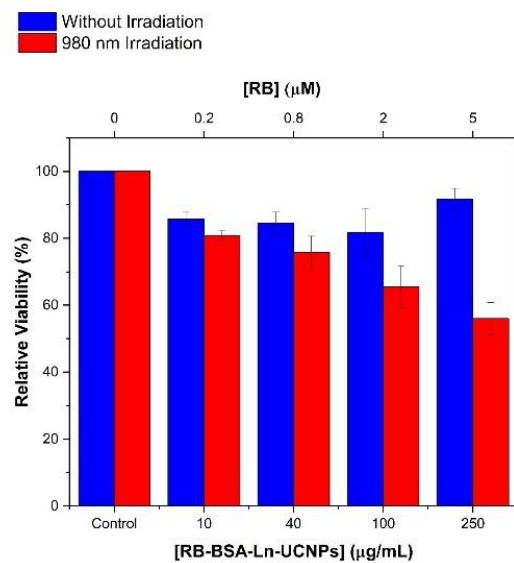

**Figure S8.** Viability assay of A549 cell using different concentrations of RB-BSA-Ln-UCNPs. Blue columns without irradiation, and red columns under 980 nm excitation for 10 minutes period, using A549 cells. Four different concentrations 10, 40, 100, and 250  $\mu\text{g}$  of nanoconstruct used.

## References

1. Bogdan, N.; Vetrone, F.; Ozin, G. A.; Capobianco, J. A., Synthesis of ligand-free colloiddally stable water dispersible brightly luminescent lanthanide-doped upconverting nanoparticles. *Nano letters* **2011**, *11* (2), 835-840.
2. Weber, C.; Coester, C.; Kreuter, J.; Langer, K., Desolvation process and surface characterisation of protein nanoparticles. *International journal of pharmaceutics* **2000**, *194* (1), 91-102.
3. Bergstrm, L.; Shinozaki, K.; Tomiyama, H.; Mizutani, N., Colloidal processing of a very fine BaTiO<sub>3</sub> powder—effect of particle interactions on the suspension properties, consolidation, and sintering behavior. *Journal of the American Ceramic Society* **1997**, *80* (2), 291-300.
4. Habeeb, A. S. A., Determination of free amino groups in proteins by trinitrobenzenesulfonic acid. *Analytical biochemistry* **1966**, *14* (3), 328-336.
5. Liu, K.; Liu, X.; Zeng, Q.; Zhang, Y.; Tu, L.; Liu, T.; Kong, X.; Wang, Y.; Cao, F.; Lambrechts, S. A., Covalently assembled NIR nanoplatfrom for simultaneous fluorescence imaging and photodynamic therapy of cancer cells. *ACS nano* **2012**, *6* (5), 4054-4062.
6. Yu, Q.; Rodriguez, E.; Naccache, R.; Forgione, P.; Lamoureux, G.; Sanz-Rodriguez, F.; Scheglmann, D.; Capobianco, J., Chemical modification of temoporfin—a second generation photosensitizer activated using upconverting nanoparticles for singlet oxygen generation. *Chemical Communications* **2014**, *50* (81), 12150-12153.
